# Supplementary material for: Cancer Stem-like Properties in Colorectal Cancer Cells with Low Proteasome Activity
Source: Oxford University Press journal article supplement (doi:10.1158/1078-0432.ccr-15-1945), 2016-05-11
Supplement: 10780432ccr151945-sup-153027_1_supp_3427488_l4v094.docx [file 10780432ccr151945-sup-153027_1_supp_3427488_l4v094.docx]

| No | Name of gene | Fold-change(average) |
| --- | --- | --- |
| 1 | ACTA1 | 27.4 |
| 2 | MMP1 | 19.3 |
| 3 | THC2681728 | 14.8 |
| 4 | MLC1 | 14.4 |
| 5 | BM686390 | 11.5 |
| 6 | SBSN | 11.1 |
| 7 | ENST00000447535 | 8.3 |
| 8 | PYGM | 7.3 |
| 9 | AOC3 | 6.3 |
| 10 | DKFZp451A211 | 6.2 |
| 11 | MIR100HG | 6.1 |
| 12 | ABCB1 | 6.0 |
| 13 | HIST2H2BF | 5.7 |
| 14 | RRAD | 5.0 |
| 15 | USP17 | 4.6 |
| 16 | ARL14 | 4.4 |
| 17 | TRMT61A | 4.3 |
| 18 | FBXW10 | 3.8 |
| 19 | ATG9B | 3.8 |
| 20 | EID3 | 3.6 |
| 21 | C1S | 3.2 |
| 22 | RFPL3-AS1 | 3.2 |
| 23 | SPAG5-AS1 | 3.1 |

Supplementary Table I. The list of universally elevated genes in LPACｓ of all cell lines using microarray analysis.
