# Supplementary material for: Cancer Stem-like Properties in Colorectal Cancer Cells with Low Proteasome Activity
Source: Oxford University Press journal article supplement (doi:10.1158/1078-0432.ccr-15-1945), 2016-05-11
Supplement: 10780432ccr151945-sup-153027_1_supp_3427489_s4v094.docx [file 10780432ccr151945-sup-153027_1_supp_3427489_s4v094.docx]

Supplementary Table II. Relationship between EID3 expression and clinicopathological factors in patients with colorectal cancer

|  | Total | EID3 mRNA expression | |  |
| --- | --- | --- | --- | --- |
|  | n=190 | Low(n=45) | High(n=145) | *P*-value |
| Age(years) | 66.1±10.1 | 67.7±11.6 | 65.7±9.7 | 0.36 |
| Gender  Male/ Female | 114/ 76 | 26/ 19 | 88/ 57 | 0.86 |
| Tumor location  colon/ rectum | 120/ 70 | 33/ 12 | 87/ 58 | 0.15 |
| Depth of invasiona  ~mp/ ss~ | 15/ 175 | 7/ 38 | 8/ 137 | 0.06 |
| Lymph node metastasis  Present/ Absent | 98/ 92 | 19/ 26 | 79/ 66 | 0.21 |
| Histological grade  well differentiated/ others | 45/ 145 | 11 / 34 | 34/ 111 | >0.99 |
| Duke’s stage  B/ C | 89/ 101 | 26/ 19 | 63/ 82 | 0.13 |
| Vessel invasion  　　　Present/ Absent | 159/ 31 | 34/ 11 | 125/ 20 | 0.14 |
| a ~mp, muscularis propria layer or above; ss~, subserosa level or below | | | | |
